# Supplementary material for: Preparation, Characterization and Application of Active Food Packaging Films Based on Sodium Alginate and Twelve Varieties of Mandarin Peel Powder
Source: MDPI journal article supplement (doi:10.3390/foods13081174), 2024-04-12
Supplement: s1 [file s1]

**Supplemental data:**

**Preparation, characterization and application of active food packaging films  
based on sodium alginate and twelve varieties of mandarin peel powder**

Dawei Yun, Jun Liu \*

College of Food Science and Engineering, Yangzhou University, Yangzhou 225127,

PR China

\* Corresponding author. E-mail: [junliu@yzu.edu.cn](mailto:junliu@yzu.edu.cn)

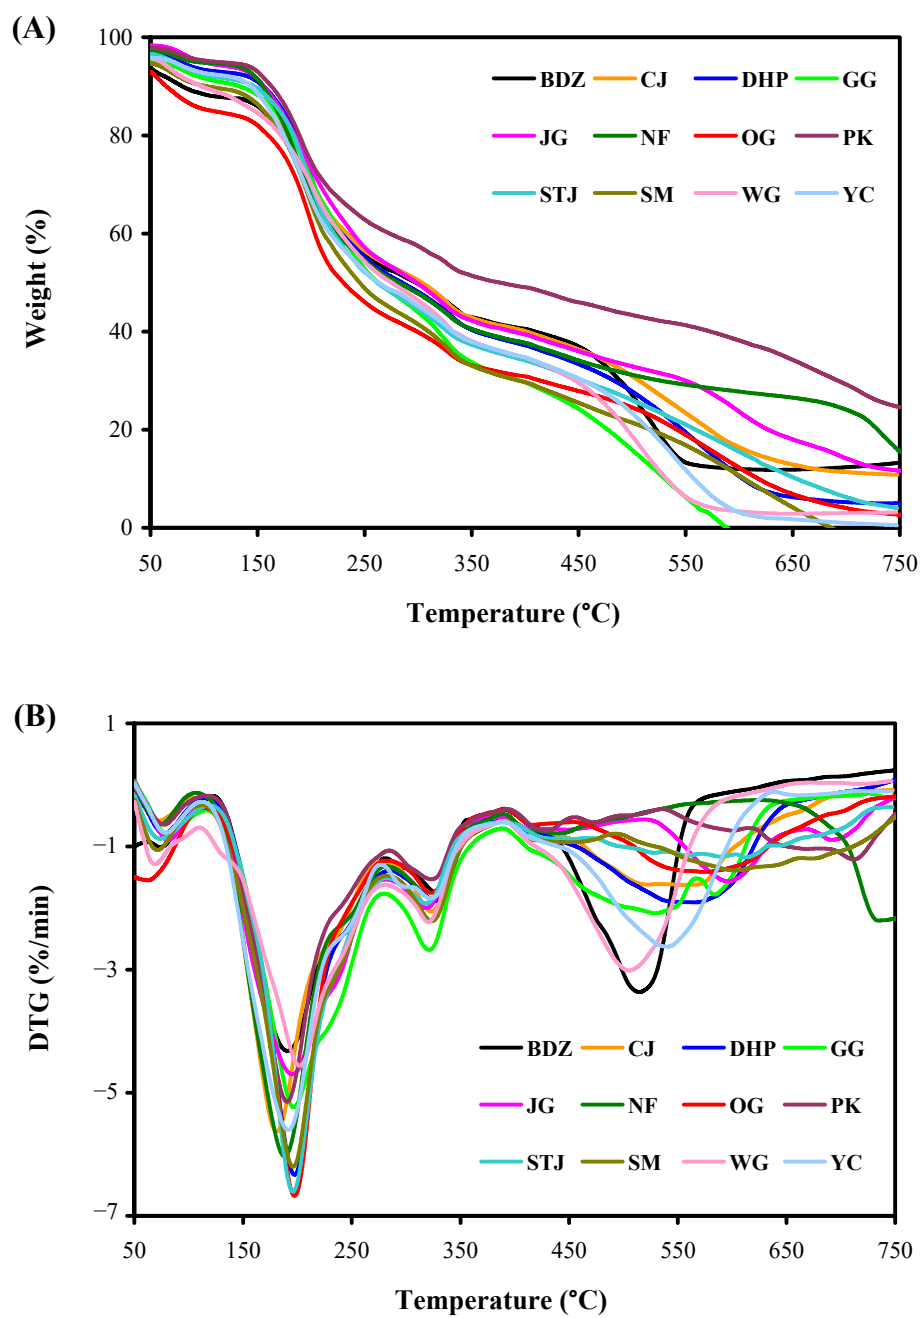

**Figure S1.** TG (A) and DTG (B) curves of sodium alginate/mandarin peel powder films.

**Table S1.** TGA data for sodium alginate/mandarin peel powder films.

| Film | Stage I    |                 | Stage II   |                 | Stage III  |                 | Stage IV   |                 | $T_m$ (°C) | Weight residue<br>at 750 °C (%) |
|------|------------|-----------------|------------|-----------------|------------|-----------------|------------|-----------------|------------|---------------------------------|
|      | Range (°C) | Weight loss (%) |            |                                 |
| BDZ  | 50–129     | 12.41           | 129–287    | 36.37           | 287–395    | 10.52           | 395–750    | 27.44           | 191        | 13.26                           |
| CJ   | 50–113     | 5.32            | 113–285    | 42.49           | 285–387    | 11.42           | 387–750    | 29.95           | 194        | 10.82                           |
| DHP  | 50–120     | 7.12            | 120–284    | 42.78           | 284–392    | 12.44           | 392–750    | 32.58           | 197        | 5.08                            |
| GG   | 50–121     | 9.34            | 121–286    | 44.36           | 286–397    | 16.45           | 397–750    | 29.85           | 197        | 0.00                            |
| JG   | 50–123     | 5.95            | 123–283    | 41.94           | 283–383    | 11.80           | 383–750    | 28.68           | 195        | 11.63                           |
| NF   | 50–114     | 5.35            | 114–287    | 45.31           | 287–396    | 11.43           | 396–750    | 22.39           | 188        | 15.52                           |
| OG   | 50–122     | 15.57           | 122–288    | 43.23           | 288–396    | 10.23           | 396–750    | 28.32           | 197        | 2.65                            |
| PK   | 50–123     | 5.19            | 123–289    | 36.31           | 289–401    | 9.49            | 401–750    | 24.43           | 190        | 24.58                           |
| STJ  | 50–125     | 8.55            | 125–288    | 45.14           | 288–399    | 12.12           | 399–750    | 30.24           | 196        | 3.95                            |
| SM   | 50–116     | 10.46           | 116–285    | 46.09           | 285–397    | 13.61           | 397–750    | 29.84           | 183        | 0.00                            |
| WG   | 50–117     | 11.47           | 117–288    | 40.37           | 288–395    | 13.20           | 395–750    | 31.81           | 203        | 3.15                            |
| YC   | 50–116     | 7.74            | 116–284    | 44.67           | 284–399    | 12.81           | 399–750    | 34.30           | 192        | 0.48                            |

$T_m$ : temperature with the maximum decomposition rate.
